# Supplementary material
Source: Springer Nature journal article supplement (https://www.springermedizin.de/resource/supplementary/12874_2008_330_MOESM2_ESM.pdf/9434242)
Supplement: MOESM2 [file 9434242]

## Question categories

| <b>Category and covered topics</b>                       | <b>Number of items</b> |
|----------------------------------------------------------|------------------------|
| <b>1) Time constraints</b>                               |                        |
| Time and effort of recruitment                           | (3 items)              |
| <b>2) Difficulties including eligible patients</b>       |                        |
| Objections against intervention                          | (4 items)              |
| Too strict eligibility criteria                          | (1 item)               |
| Poor reachability of patients                            | (1 item)               |
| Competing trials                                         | (1 item)               |
| <b>3) Limited human resources</b>                        |                        |
| Missing resources and support from trial coordinators    | (3 items)              |
| Missing organization and support within work setting     | (4 items)              |
| <b>4) Trial design barriers</b>                          |                        |
| Doubted scientific rationale of trial question           | (3 items)              |
| Doubted relevance of the trial question                  | (2 items)              |
| Complexity of the trial                                  | (2 items)              |
| <b>5) Insufficient training of recruiting physicians</b> |                        |
| General briefing and instruction                         | (1 item)               |
| Understanding of randomization procedure                 | (1 item)               |
| <b>6) Individual barriers of recruiting physicians</b>   |                        |
| Ethical concerns                                         | (1 item)               |
| Doubted benefit for the patient                          | (3 items)              |
| Suspected negative effect on doctor-patient relationship | (2 items)              |
| Missing incentives                                       | (1 item)               |
| <b>7) Lack of access to treatment</b>                    |                        |
| Availability of rehabilitation programs                  | (2 items)              |
|                                                          | <b>Total</b>           |
|                                                          | <b>35 items</b>        |
